# Supplementary material
Source: MDPI journal article supplement (https://www.mdpi.com/2813-141X/2/4/27)
Supplement: s1 [file s1]

**Supplementary Table S1. Results of Levene test**

|             | <b>Levene<br/>Statistics</b> | <i>P</i> -value |
|-------------|------------------------------|-----------------|
| Question 1  | 0.378                        | 0.685           |
| Question 2  | 0.011                        | 0.989           |
| Question 3  | 2.304                        | 0.101           |
| Question 4  | 2.821                        | 0.061           |
| Question 5  | 1.022                        | 0.361           |
| Question 6  | 3.404                        | 0.034           |
| Question 7  | 7.463                        | 0.001           |
| Question 8  | 1.148                        | 0.318           |
| Question 9  | 4.260                        | 0.015           |
| Question 10 | 2.719                        | 0.067           |
| Question 11 | 0.601                        | 0.549           |
| Question 12 | 1.729                        | 0.179           |
| Question 13 | 0.178                        | 0.837           |
| Question 14 | 2.447                        | 0.088           |
| Question 15 | 1.845                        | 0.159           |
| Question 16 | 1.056                        | 0.349           |
| Question 17 | 0.986                        | 0.374           |
| Question 18 | 3.110                        | 0.046           |
| Question 19 | 0.092                        | 0.912           |
| Question 20 | 0.665                        | 0.515           |

**Supplementary Table S2: Exploratory factor analysis of the original survey used in this study.**

| <b>Item</b>                                                                               | <b>Factor 1 (Motivation)<br/>Loading</b> | <b>Factor 2 (WTC)<br/>Loading</b> |
|-------------------------------------------------------------------------------------------|------------------------------------------|-----------------------------------|
| 1. I want to speak English with foreign visitors to Japan.                                | -0.79                                    | -0.43                             |
| 2. I want to speak English for traveling overseas.                                        | -0.62                                    | -0.45                             |
| 3. I want to be part of the global community of people who can communicate in English.    | -0.79                                    | -0.42                             |
| 4. I think knowing English can help me understand the world better.                       | -0.51                                    | -0.50                             |
| 5. I want to be good at English so I can read articles in international medical journals. | -0.75                                    | -0.21                             |
| 6. In the future, I want to publish my research in international medical journals.        | -0.90                                    | 0.08                              |

|     |                                                                                         |       |       |
|-----|-----------------------------------------------------------------------------------------|-------|-------|
| 7.  | In the future I want to make a presentation at an international conference in English.  | -0.89 | 0.00  |
| 8.  | In the future, I want to speak to foreign patients in English.                          | -0.83 | -0.31 |
| 9.  | In the future, I want to work in another country.                                       | -0.95 | -0.13 |
| 10. | In the future, I want to study abroad.                                                  | -0.91 | -0.14 |
| 11. | In English class, I like to speak English in pairs.                                     | -0.77 | 0.23  |
| 12. | In English class, I like to speak English in small groups.                              | -0.74 | 0.27  |
| 13. | In English class, I like to give presentations.                                         | -0.85 | 0.47  |
| 14. | In English class, I like to raise my hand to answer the teacher's questions.            | -0.72 | 0.53  |
| 15. | I like to talk to my English teacher after class.                                       | -0.86 | 0.31  |
| 16. | I like to talk to international students on campus in English.                          | -1.03 | 0.16  |
| 17. | I like to participate in international events and activities offered by the university. | -1.01 | 0.15  |
| 18. | I like to interact in English on social media.                                          | -0.94 | 0.13  |
| 19. | I like to help foreigners I meet outside of the university.                             | -0.82 | -0.05 |
| 20. | I like to write English e-mails or texts.                                               | -0.97 | 0.18  |

---
